# Supplementary material for: Reference values for adiposity indices and their associations with sarcopenic obesity in Korean adults: findings from the KNHANES database
Source: Research Square preprint supplement (doi:10.21203/rs.3.rs-8852127/v1), 2026-02-20
Supplement: Supplementary file 1 [file 715f23580d70dfce1358de4b.docx]

**
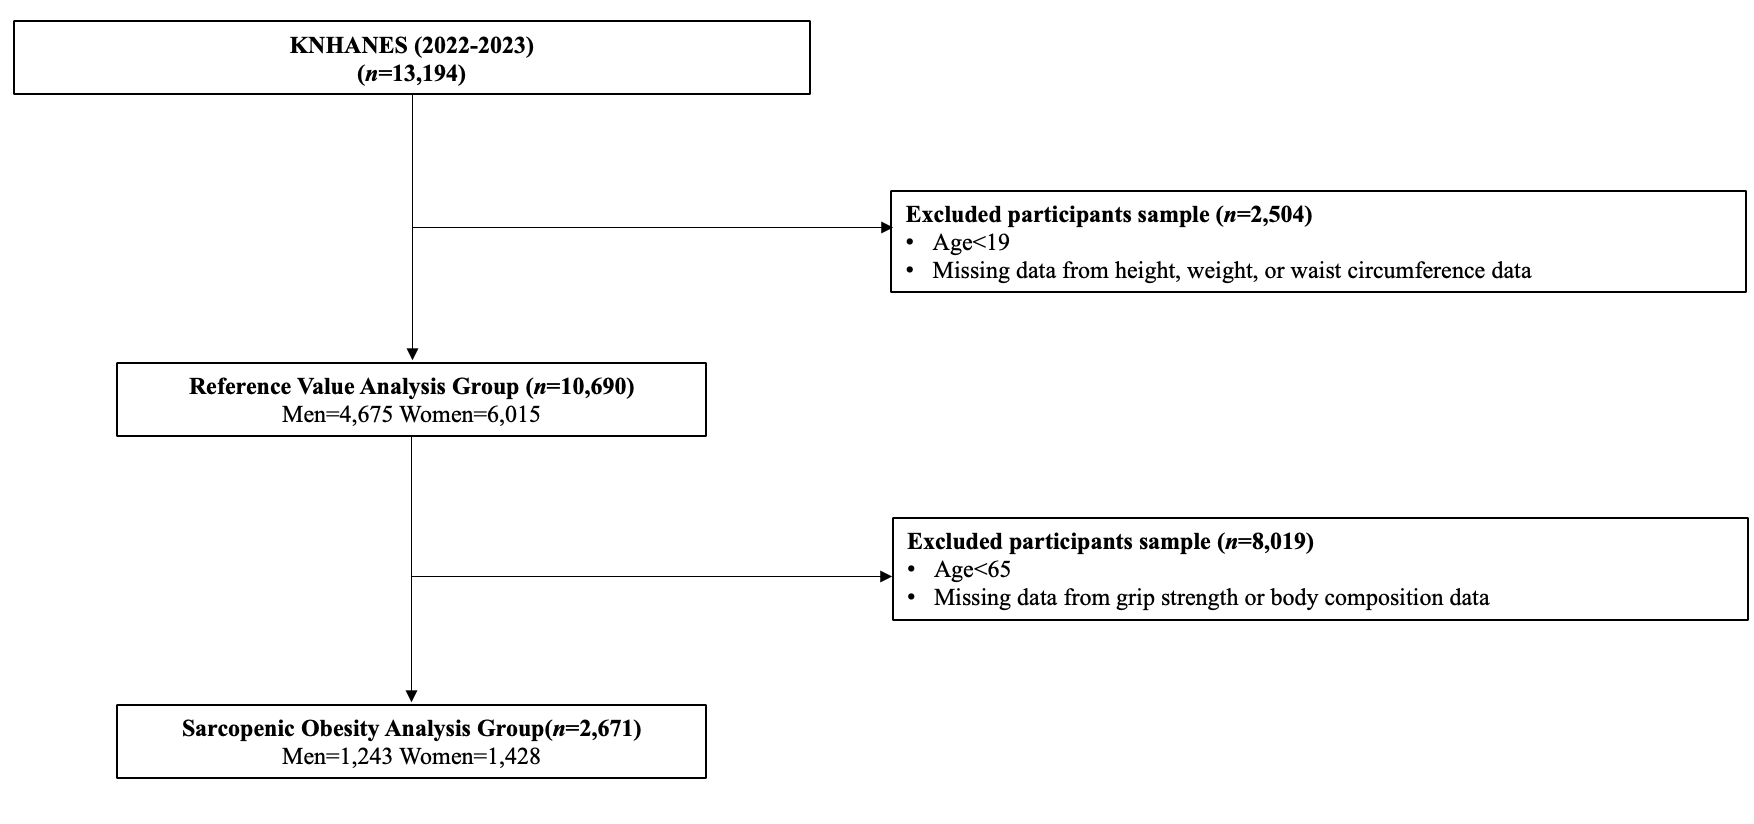
Figure S1.** Flow chart of the participants

**Table S1.** Characteristics of participants aged ≥ 65 years

| Variables | Men  (n=1,243) | Women  (n=1,428) | *P* value |
| --- | --- | --- | --- |
| Age (years) | 72.42 ± 5.08 | 72.21 ± 4.97 | 0.172 |
| Height (cm) | 166.56 ± 5.70 | 153.23 ± 5.39 | 0.063 |
| Weight (kg) | 66.11 ± 9.55 | 57.02 ± 8.67 | 0.002 |
| WC (cm) | 88.26 ± 8.76 | 84.77 ± 8.98 | 0.213 |
| ABSI | 82.80 ± 3.67 | 81.88 ± 3.98 | <.001 |
| BMI (kg/m²) | 23.79 ± 2.93 | 24.26 ± 3.33 | <.001 |
| ConI | 1.29 ± 0.07 | 1.28 ± 0.07 | <.001 |
| wBMI | 21.22 ± 4.55 | 20.83 ± 4.94 | 0.017 |
| WHtR | 0.53 ± 0.05 | 0.55 ± 0.06 | <.001 |
| WWI | 10.87 ± 0.58 | 11.25 ± 0.67 | <.001 |
| Systolic blood pressure (mmHg) | 126.89 ± 16.51 | 127.40 ± 16.62 | 0.890 |
| Diastolic blood pressure (mmHg) | 74.05 ± 9.26 | 72.93 ± 8.72 | 0.081 |
| Total cholesterol (mg/dL) | 168.17 ± 38.25 | 180.48 ± 42.76 | <.001 |
| HDL cholesterol (mg/dL) | 51.94 ± 13.86 | 58.10 ± 14.69 | 0.112 |
| LDL cholesterol (mg/dL) | 99.49 ± 35.24 | 106.34 ± 39.29 | <.001 |
| Triglyceride (mg/dL) | 125.92 ± 73.57 | 118.70 ± 56.26 | <.001 |
| Fasting glucose (mg/dL) | 108.62 ± 26.31 | 104.78 ± 22.03 | 0.002 |
| Maximum grip strength (kg) | 34.27 ± 6.73 | 21.83 ± 4.30 | <.001 |
| ASM (kg) | 20.46 ± 2.89 | 14.11 ± 2.10 | <.001 |
| ASM/height² (kg/m²) | 7.35 ± 0.73 | 5.98 ± 0.66 | 0.004 |
| Total body fat percentage (%) | 25.75 ± 5.54 | 34.87 ± 5.74 | 0.418 |
| Total body fat mass (kg) | 17.30 ± 5.44 | 20.20 ± 5.77 | 0.037 |
| Total lean body mass (kg) | 48.77 ± 5.96 | 36.78 ± 4.20 | <.001 |
| ECW/TBW ratio (%) | 38.74 ± 0.72 | 39.12 ± 0.73 | 0.023 |

*Notes*: Data are presented as mean ± standard deviation or number (percentage). WC, waist circumference; ABSI, a body shape index; BMI, body mass index; ConI, conicity index; wBMI, waist-corrected BMI; WHtR, waist-to-height ratio; WWI, weight-adjusted waist index; HDL, high-density lipoprotein; LDL, low-density lipoprotein; ASM, appendicular skeletal muscle; ECW, extracellular water; TBW, total body water

**Table S2.** Sex- and age-specific reference values for adiposity indices (5-year interval)

| ***A Body Shape Index (ABSI)*** | | |  |  |  |  |  |  |
| --- | --- | --- | --- | --- | --- | --- | --- | --- |
|  | n | L | M | S | P20 | P40 | P60 | P80 |
| **Men** |  |  |  |  |  |  |  |  |
| 19–24 | 265 | 0.27 | 75.07 | 0.04 | 72.51 | 74.29 | 75.86 | 77.70 |
| 25–29 | 275 | 0.98 | 76.46 | 0.04 | 73.76 | 75.65 | 77.27 | 79.16 |
| 30–34 | 270 | 1.42 | 77.15 | 0.04 | 74.56 | 76.38 | 77.93 | 79.71 |
| 35–39 | 312 | 1.48 | 77.99 | 0.04 | 75.47 | 77.24 | 78.74 | 80.47 |
| 40–44 | 390 | 3.06 | 78.66 | 0.04 | 76.05 | 77.89 | 79.41 | 81.10 |
| 45–49 | 357 | 1.53 | 78.81 | 0.04 | 76.31 | 78.06 | 79.55 | 81.26 |
| 50–54 | 399 | 1.26 | 79.60 | 0.04 | 76.96 | 78.81 | 80.38 | 82.20 |
| 55–59 | 418 | 1.17 | 80.49 | 0.04 | 77.67 | 79.64 | 81.33 | 83.29 |
| 60–64 | 507 | -0.54 | 80.92 | 0.04 | 78.15 | 80.07 | 81.78 | 83.85 |
| 65–69 | 524 | 3.46 | 82.00 | 0.04 | 78.99 | 81.12 | 82.85 | 84.76 |
| 70–74 | 403 | 1.18 | 82.87 | 0.04 | 79.90 | 81.98 | 83.76 | 85.83 |
| 75–79 | 326 | 4.32 | 84.19 | 0.04 | 81.23 | 83.34 | 85.02 | 86.84 |
| 80 | 229 | 0.80 | 84.00 | 0.05 | 80.77 | 83.02 | 84.98 | 87.26 |
| **Women** |  |  |  |  |  |  |  |  |
| 19–24 | 323 | 2.68 | 72.30 | 0.04 | 69.50 | 71.48 | 73.11 | 74.94 |
| 25–29 | 300 | -3.35 | 73.18 | 0.05 | 70.56 | 72.35 | 74.06 | 76.29 |
| 30–34 | 324 | -1.22 | 74.39 | 0.05 | 71.18 | 73.39 | 75.42 | 77.93 |
| 35–39 | 392 | -0.37 | 75.21 | 0.05 | 72.39 | 74.35 | 76.08 | 78.17 |
| 40–44 | 538 | 0.20 | 75.46 | 0.05 | 72.47 | 74.55 | 76.38 | 78.55 |
| 45–49 | 482 | 0.24 | 76.08 | 0.04 | 73.41 | 75.27 | 76.90 | 78.83 |
| 50–54 | 590 | -1.12 | 77.06 | 0.05 | 74.19 | 76.17 | 77.97 | 80.17 |
| 55–59 | 557 | 1.32 | 78.53 | 0.05 | 75.46 | 77.61 | 79.45 | 81.57 |
| 60–64 | 706 | 0.28 | 79.07 | 0.05 | 76.01 | 78.14 | 80.01 | 82.22 |
| 65–69 | 651 | 1.81 | 80.51 | 0.05 | 77.33 | 79.56 | 81.44 | 83.59 |
| 70–74 | 467 | 0.70 | 82.11 | 0.05 | 78.78 | 81.10 | 83.12 | 85.48 |
| 75–79 | 396 | 2.36 | 83.04 | 0.05 | 79.72 | 82.06 | 84.01 | 86.19 |
| 80 | 289 | 3.00 | 84.12 | 0.05 | 80.58 | 83.09 | 85.13 | 87.39 |
| ***Body Mass Index (BMI)*** | | |  |  |  |  |  |  |
|  | n | L | M | S | P20 | P40 | P60 | P80 |

| **Men** |  |  |  |  |  |  |  |  |
| --- | --- | --- | --- | --- | --- | --- | --- | --- |
| 19–24 | 265 | -1.07 | 23.90 | 0.18 | 20.76 | 22.85 | 25.04 | 28.20 |
| 25–29 | 275 | -0.56 | 24.81 | 0.16 | 21.87 | 23.86 | 25.82 | 28.42 |
| 30–34 | 270 | -0.34 | 25.44 | 0.15 | 22.44 | 24.48 | 26.44 | 28.99 |
| 35–39 | 312 | -0.10 | 25.34 | 0.15 | 22.30 | 24.38 | 26.34 | 28.84 |
| 40–44 | 390 | -0.32 | 25.46 | 0.14 | 22.71 | 24.59 | 26.38 | 28.67 |
| 45–49 | 357 | -0.08 | 25.03 | 0.14 | 22.23 | 24.14 | 25.94 | 28.21 |
| 50–54 | 399 | -0.15 | 24.87 | 0.13 | 22.38 | 24.09 | 25.68 | 27.68 |
| 55–59 | 418 | -0.14 | 24.94 | 0.13 | 22.44 | 24.16 | 25.76 | 27.77 |
| 60–64 | 507 | 0.41 | 23.95 | 0.13 | 21.49 | 23.19 | 24.72 | 26.58 |
| 65–69 | 524 | 0.35 | 24.05 | 0.12 | 21.70 | 23.33 | 24.79 | 26.56 |
| 70–74 | 403 | 0.82 | 23.60 | 0.13 | 21.12 | 22.85 | 24.36 | 26.14 |
| 75–79 | 326 | 0.72 | 23.80 | 0.12 | 21.39 | 23.06 | 24.53 | 26.27 |
| 80 | 229 | 1.41 | 23.03 | 0.11 | 20.81 | 22.37 | 23.68 | 25.17 |
| **Women** |  |  |  |  |  |  |  |  |
| 19–24 | 323 | -1.60 | 21.47 | 0.17 | 18.94 | 20.62 | 22.42 | 25.13 |
| 25–29 | 300 | -1.72 | 21.46 | 0.15 | 19.15 | 20.68 | 22.31 | 24.72 |
| 30–34 | 324 | -1.46 | 22.33 | 0.17 | 19.60 | 21.41 | 23.35 | 26.24 |
| 35–39 | 392 | -1.51 | 21.93 | 0.15 | 19.56 | 21.14 | 22.80 | 25.19 |
| 40–44 | 538 | -1.49 | 22.23 | 0.15 | 19.80 | 21.42 | 23.12 | 25.58 |
| 45–49 | 482 | -1.27 | 22.71 | 0.15 | 20.17 | 21.87 | 23.63 | 26.13 |
| 50–54 | 590 | -1.16 | 22.91 | 0.14 | 20.54 | 22.13 | 23.74 | 25.95 |
| 55–59 | 557 | -0.49 | 23.53 | 0.14 | 21.06 | 22.75 | 24.36 | 26.46 |
| 60–64 | 706 | -0.49 | 23.65 | 0.14 | 21.08 | 22.83 | 24.52 | 26.72 |
| 65–69 | 651 | -0.42 | 24.16 | 0.14 | 21.60 | 23.35 | 25.02 | 27.18 |
| 70–74 | 467 | 1.10 | 24.12 | 0.14 | 21.31 | 23.28 | 24.96 | 26.90 |
| 75–79 | 396 | 0.63 | 24.44 | 0.13 | 21.73 | 23.61 | 25.28 | 27.27 |
| 80 | 289 | -0.02 | 23.69 | 0.13 | 21.17 | 22.90 | 24.51 | 26.52 |
| ***Conicity Index (ConI)*** | | |  |  |  |  |  |  |
|  | n | L | M | S | P20 | P40 | P60 | P80 |
| **Men** |  |  |  |  |  |  |  |  |
| 19–24 | 265 | -1.40 | 1.17 | 0.06 | 1.12 | 1.15 | 1.19 | 1.23 |
| 25–29 | 275 | -1.09 | 1.20 | 0.05 | 1.15 | 1.18 | 1.21 | 1.25 |
| 30–34 | 270 | 0.84 | 1.21 | 0.05 | 1.16 | 1.20 | 1.23 | 1.27 |
| 35–39 | 312 | -0.49 | 1.22 | 0.05 | 1.18 | 1.21 | 1.24 | 1.27 |
| 40–44 | 390 | 1.05 | 1.24 | 0.05 | 1.19 | 1.22 | 1.25 | 1.29 |
| 45–49 | 357 | 2.07 | 1.24 | 0.05 | 1.19 | 1.22 | 1.25 | 1.29 |
| 50–54 | 399 | 2.33 | 1.25 | 0.04 | 1.20 | 1.24 | 1.26 | 1.29 |
| 55–59 | 418 | 2.30 | 1.26 | 0.05 | 1.21 | 1.25 | 1.28 | 1.31 |
| 60–64 | 507 | 0.25 | 1.26 | 0.05 | 1.21 | 1.25 | 1.28 | 1.31 |
| 65–69 | 524 | 3.10 | 1.28 | 0.05 | 1.22 | 1.26 | 1.29 | 1.33 |
| 70–74 | 403 | 2.88 | 1.29 | 0.05 | 1.23 | 1.27 | 1.31 | 1.34 |
| 75–79 | 326 | 3.63 | 1.31 | 0.05 | 1.25 | 1.29 | 1.33 | 1.36 |
| 80 | 229 | 2.62 | 1.30 | 0.05 | 1.24 | 1.28 | 1.32 | 1.36 |
| **Women** |  |  |  |  |  |  |  |  |
| 19–24 | 323 | 0.59 | 1.11 | 0.05 | 1.06 | 1.09 | 1.12 | 1.16 |
| 25–29 | 300 | -3.26 | 1.12 | 0.06 | 1.07 | 1.11 | 1.14 | 1.18 |
| 30–34 | 324 | -1.81 | 1.15 | 0.06 | 1.09 | 1.13 | 1.17 | 1.21 |
| 35–39 | 392 | -2.38 | 1.15 | 0.05 | 1.11 | 1.14 | 1.17 | 1.21 |
| 40–44 | 538 | -1.36 | 1.16 | 0.06 | 1.11 | 1.14 | 1.18 | 1.22 |
| 45–49 | 482 | -0.45 | 1.18 | 0.05 | 1.12 | 1.16 | 1.19 | 1.23 |
| 50–54 | 590 | -1.21 | 1.19 | 0.05 | 1.14 | 1.18 | 1.21 | 1.25 |
| 55–59 | 557 | 1.44 | 1.22 | 0.06 | 1.16 | 1.20 | 1.24 | 1.28 |
| 60–64 | 706 | 0.10 | 1.23 | 0.06 | 1.17 | 1.21 | 1.25 | 1.29 |
| 65–69 | 651 | 1.89 | 1.26 | 0.05 | 1.20 | 1.24 | 1.27 | 1.31 |
| 70–74 | 467 | 2.71 | 1.28 | 0.06 | 1.22 | 1.26 | 1.30 | 1.34 |
| 75–79 | 396 | 3.09 | 1.30 | 0.05 | 1.24 | 1.28 | 1.32 | 1.35 |
| 80 | 289 | 3.81 | 1.31 | 0.05 | 1.25 | 1.29 | 1.33 | 1.37 |
| ***Waist-corrected Body Mass Index (wBMI)*** | | | |  |  |  |  |  |
|  | n | L | M | S | P20 | P40 | P60 | P80 |
| **Men** |  |  |  |  |  |  |  |  |
| 19–24 | 265 | -0.68 | 19.59 | 0.31 | 15.41 | 18.15 | 21.24 | 26.10 |
| 25–29 | 275 | -0.37 | 21.22 | 0.27 | 17.07 | 19.83 | 22.73 | 26.88 |
| 30–34 | 270 | -0.16 | 22.45 | 0.26 | 18.07 | 21.01 | 24.01 | 28.13 |
| 35–39 | 312 | -0.16 | 22.48 | 0.26 | 18.10 | 21.04 | 24.03 | 28.13 |
| 40–44 | 390 | -0.18 | 22.87 | 0.24 | 18.76 | 21.53 | 24.30 | 28.07 |
| 45–49 | 357 | 0.05 | 22.20 | 0.25 | 18.03 | 20.86 | 23.63 | 27.29 |
| 50–54 | 399 | -0.03 | 22.07 | 0.21 | 18.44 | 20.90 | 23.30 | 26.43 |
| 55–59 | 418 | 0.09 | 22.39 | 0.22 | 18.62 | 21.18 | 23.65 | 26.84 |
| 60–64 | 507 | 0.19 | 20.95 | 0.22 | 17.32 | 19.80 | 22.15 | 25.16 |
| 65–69 | 524 | 0.30 | 21.25 | 0.21 | 17.67 | 20.12 | 22.42 | 25.30 |
| 70–74 | 403 | 0.58 | 20.83 | 0.22 | 17.14 | 19.69 | 22.00 | 24.83 |
| 75–79 | 326 | 0.39 | 21.23 | 0.22 | 17.58 | 20.09 | 22.41 | 25.30 |
| 80 | 229 | 0.94 | 20.13 | 0.20 | 16.74 | 19.10 | 21.15 | 23.55 |

| **Women** |  |  |  |  |  |  |  |  |
| --- | --- | --- | --- | --- | --- | --- | --- | --- |
| 19–24 | 323 | -1.04 | 15.17 | 0.27 | 12.34 | 14.18 | 16.30 | 19.73 |
| 25–29 | 300 | -1.05 | 15.44 | 0.26 | 12.71 | 14.50 | 16.52 | 19.72 |
| 30–34 | 324 | -0.84 | 16.79 | 0.29 | 13.42 | 15.63 | 18.13 | 22.15 |
| 35–39 | 392 | -0.95 | 16.38 | 0.25 | 13.49 | 15.39 | 17.50 | 20.77 |
| 40–44 | 538 | -0.88 | 16.80 | 0.26 | 13.72 | 15.75 | 18.00 | 21.51 |
| 45–49 | 482 | -0.69 | 17.55 | 0.27 | 14.25 | 16.43 | 18.81 | 22.39 |
| 50–54 | 590 | -0.67 | 17.95 | 0.24 | 14.87 | 16.92 | 19.09 | 22.27 |
| 55–59 | 557 | -0.17 | 19.06 | 0.24 | 15.63 | 17.94 | 20.26 | 23.41 |
| 60–64 | 706 | -0.22 | 19.29 | 0.25 | 15.75 | 18.13 | 20.55 | 23.86 |
| 65–69 | 651 | -0.11 | 20.26 | 0.24 | 16.60 | 19.07 | 21.53 | 24.82 |
| 70–74 | 467 | 0.80 | 20.56 | 0.24 | 16.54 | 19.33 | 21.81 | 24.76 |
| 75–79 | 396 | 0.50 | 21.10 | 0.23 | 17.19 | 19.88 | 22.36 | 25.42 |
| 80 | 289 | 0.18 | 20.14 | 0.23 | 16.50 | 18.98 | 21.36 | 24.42 |

| ***Waist- to-height Ratio (WHtR)*** | | |  |  |  |  |  |  |
| --- | --- | --- | --- | --- | --- | --- | --- | --- |
|  | n | L | M | S | P20 | P40 | P60 | P80 |
| **Men** |  |  |  |  |  |  |  |  |
| 19–24 | 265 | -1.50 | 0.47 | 0.14 | 0.42 | 0.45 | 0.49 | 0.53 |
| 25–29 | 275 | -1.20 | 0.49 | 0.12 | 0.45 | 0.48 | 0.51 | 0.54 |
| 30–34 | 270 | -0.12 | 0.50 | 0.12 | 0.46 | 0.49 | 0.52 | 0.56 |
| 35–39 | 312 | -0.47 | 0.51 | 0.11 | 0.46 | 0.49 | 0.52 | 0.56 |
| 40–44 | 390 | -0.36 | 0.51 | 0.11 | 0.47 | 0.50 | 0.53 | 0.56 |
| 45–49 | 357 | 0.29 | 0.51 | 0.11 | 0.47 | 0.50 | 0.53 | 0.56 |
| 50–54 | 399 | 0.12 | 0.52 | 0.09 | 0.48 | 0.51 | 0.53 | 0.56 |
| 55–59 | 418 | 0.47 | 0.53 | 0.10 | 0.49 | 0.52 | 0.54 | 0.57 |
| 60–64 | 507 | 0.56 | 0.52 | 0.10 | 0.47 | 0.50 | 0.53 | 0.56 |
| 65–69 | 524 | 0.81 | 0.53 | 0.10 | 0.49 | 0.51 | 0.54 | 0.57 |
| 70–74 | 403 | 1.60 | 0.53 | 0.10 | 0.48 | 0.52 | 0.54 | 0.57 |
| 75–79 | 326 | 1.50 | 0.54 | 0.10 | 0.50 | 0.53 | 0.56 | 0.59 |
| 80 | 229 | 2.20 | 0.53 | 0.09 | 0.49 | 0.52 | 0.55 | 0.57 |
| **Women** |  |  |  |  |  |  |  |  |
| 19–24 | 323 | -2.62 | 0.44 | 0.11 | 0.40 | 0.42 | 0.45 | 0.49 |
| 25–29 | 300 | -1.97 | 0.45 | 0.12 | 0.41 | 0.43 | 0.46 | 0.50 |
| 30–34 | 324 | -1.90 | 0.46 | 0.13 | 0.42 | 0.45 | 0.48 | 0.52 |
| 35–39 | 392 | -2.06 | 0.46 | 0.11 | 0.42 | 0.45 | 0.48 | 0.51 |
| 40–44 | 538 | -1.93 | 0.47 | 0.12 | 0.43 | 0.45 | 0.48 | 0.52 |
| 45–49 | 482 | -1.10 | 0.48 | 0.12 | 0.44 | 0.47 | 0.50 | 0.54 |
| 50–54 | 590 | -1.17 | 0.49 | 0.11 | 0.45 | 0.48 | 0.51 | 0.55 |
| 55–59 | 557 | 0.17 | 0.52 | 0.11 | 0.47 | 0.50 | 0.53 | 0.57 |
| 60–64 | 706 | -0.33 | 0.52 | 0.12 | 0.47 | 0.51 | 0.54 | 0.58 |
| 65–69 | 651 | 0.11 | 0.54 | 0.11 | 0.49 | 0.53 | 0.56 | 0.59 |
| 70–74 | 467 | 1.78 | 0.56 | 0.11 | 0.50 | 0.54 | 0.57 | 0.61 |
| 75–79 | 396 | 1.54 | 0.57 | 0.11 | 0.52 | 0.55 | 0.58 | 0.62 |
| 80 | 289 | 0.87 | 0.57 | 0.10 | 0.52 | 0.55 | 0.58 | 0.62 |
| ***Weight-adjusted Waist Index (WWI)*** | | | |  |  |  |  |  |
|  | n | L | M | S | P20 | P40 | P60 | P80 |
| **Men** |  |  |  |  |  |  |  |  |
| 19–24 | 265 | -0.80 | 9.65 | 0.06 | 9.19 | 9.51 | 9.80 | 10.16 |
| 25–29 | 275 | 0.20 | 9.90 | 0.06 | 9.45 | 9.76 | 10.05 | 10.38 |
| 30–34 | 270 | 1.21 | 10.01 | 0.05 | 9.57 | 9.88 | 10.15 | 10.45 |
| 35–39 | 312 | -0.26 | 10.08 | 0.05 | 9.68 | 9.96 | 10.20 | 10.50 |
| 40–44 | 390 | 1.09 | 10.20 | 0.05 | 9.77 | 10.07 | 10.33 | 10.63 |
| 45–49 | 357 | 1.42 | 10.27 | 0.05 | 9.84 | 10.14 | 10.39 | 10.69 |
| 50–54 | 399 | 1.57 | 10.40 | 0.05 | 10.00 | 10.28 | 10.53 | 10.81 |
| 55–59 | 418 | 1.15 | 10.57 | 0.05 | 10.13 | 10.44 | 10.70 | 11.01 |
| 60–64 | 507 | 0.27 | 10.56 | 0.05 | 10.11 | 10.42 | 10.70 | 11.03 |
| 65–69 | 524 | 2.68 | 10.77 | 0.05 | 10.30 | 10.63 | 10.90 | 11.21 |
| 70–74 | 403 | 2.84 | 10.89 | 0.05 | 10.40 | 10.74 | 11.03 | 11.34 |
| 75–79 | 326 | 4.03 | 11.12 | 0.05 | 10.62 | 10.98 | 11.26 | 11.56 |
| 80 | 229 | 1.64 | 11.07 | 0.05 | 10.56 | 10.92 | 11.22 | 11.56 |
| **Women** |  |  |  |  |  |  |  |  |
| 19–24 | 323 | -0.09 | 9.48 | 0.06 | 9.06 | 9.35 | 9.62 | 9.94 |
| 25–29 | 300 | -1.92 | 9.62 | 0.06 | 9.17 | 9.48 | 9.77 | 10.14 |
| 30–34 | 324 | -1.89 | 9.82 | 0.06 | 9.32 | 9.66 | 9.98 | 10.40 |
| 35–39 | 392 | -1.89 | 9.90 | 0.06 | 9.46 | 9.76 | 10.05 | 10.41 |
| 40–44 | 538 | -1.98 | 9.95 | 0.06 | 9.48 | 9.80 | 10.10 | 10.49 |
| 45–49 | 482 | -0.77 | 10.12 | 0.06 | 9.65 | 9.98 | 10.27 | 10.63 |
| 50–54 | 590 | -1.40 | 10.31 | 0.06 | 9.83 | 10.16 | 10.47 | 10.85 |
| 55–59 | 557 | 1.65 | 10.62 | 0.06 | 10.10 | 10.47 | 10.77 | 11.12 |
| 60–64 | 706 | -0.33 | 10.71 | 0.06 | 10.19 | 10.55 | 10.87 | 11.27 |
| 65–69 | 651 | 1.37 | 11.01 | 0.06 | 10.49 | 10.86 | 11.17 | 11.52 |
| 70–74 | 467 | 1.85 | 11.28 | 0.06 | 10.70 | 11.11 | 11.45 | 11.84 |
| 75–79 | 396 | 2.46 | 11.48 | 0.06 | 10.90 | 11.31 | 11.65 | 12.03 |
| 80 | 289 | 3.16 | 11.67 | 0.06 | 11.10 | 11.51 | 11.84 | 12.19 |

*Notes*: L, a Box-Cox power; M, median; S, coefficient of variation

**Table S3.** Comparison of area under the curves between men and women using DeLong's test

|  | *p*-value (DeLong) | BH adjusted *p***-**value |
| --- | --- | --- |
| WHtR | >0.05 | >0.05 |
| WWI | <0.05 | >0.05 |
| BMI | >0.05 | >0.05 |
| ABSI | <0.05 | >0.05 |
| CI | >0.05 | >0.05 |
| wBMI | >0.05 | >0.05 |

*Notes*. BH, Benjamini–Hochberg; L, a Box-Cox power; M, median; S, coefficient of variation; ABSI, a body shape index; BMI, body mass index; ConI, conicity index; wBMI, waist body mass index; WHtR, waist-to-height ratio; WWI, weight-adjusted waist index

**Table S4.** Comparison of area under the curves for six anthropometric indexes using DeLong's test

| **Men** | | | | | | |
| --- | --- | --- | --- | --- | --- | --- |
|  | ABSI | BMI | ConI | wBMI | WHtR | WWI |
| ABSI | / | <0.05 | <0.05 | <0.05 | <0.05 | <0.05 |
| BMI |  | / | <0.05 | <0.05 | <0.05 | <0.05 |
| ConI |  |  | / | <0.05 | <0.05 | <0.05 |
| wBMI |  |  |  | / | <0.05 | <0.05 |
| WHtR |  |  |  |  | / | <0.05 |
| WWI |  |  |  |  |  | / |
| **Women** | | | | | | |
|  | ABSI | BMI | ConI | wBMI | WHtR | WWI |
| ABSI | / | <0.05 | <0.05 | <0.05 | <0.05 | <0.05 |
| BMI |  | / | <0.05 | <0.05 | <0.05 | <0.05 |
| ConI |  |  | / | <0.05 | <0.05 | <0.05 |
| wBMI |  |  |  | / | <0.05 | <0.05 |
| WHtR |  |  |  |  | / | <0.05 |
| WWI |  |  |  |  |  | / |

*Notes*: ABSI, a body shape index; BMI, body mass index; ConI, conicity index; wBMI, waist body mass index; WHtR, waist-to-height ratio; WWI, weight-adjusted waist index
